## OBSERVATIONS

## Quality of Life, Coping Ability, and Metabolic Control in Patients With Type 1 Diabetes Managed By Group Care and a Carbohydrate Counting Program

Group care is a clinical-pedagogic model in which traditional routine visits are substituted by sessions of group education. This approach improves quality of life and metabolic control in patients with type 2 diabetes (1) but only quality of life in those with type 1 diabetes (2). The latter must match multiple daily insulin administrations with blood glucose monitoring, dietary intake, and energy expenditure (3). We hypothesized that to improve their coping strategies, patients with type 1 diabetes need more specific training in the technical aspects of day-to-day management of insulin therapy. To verify this, we studied the effects of embedding a carbohydrate counting program within group care on quality of life, knowledge of diabetes, coping ability, and metabolic control.

Of 56 patients with type 1 diabetes already followed by group care, 27 were randomized to receive an eight-session carbohydrate counting program and 29 continued a more generic curriculum (control subjects). Inclusion criteria were: age <70 years, onset of diabetes before age 30 years, and having started insulin treatment within 1 year of diagnosis. All patients were on four-daily injections and self-monitored blood glucose. None refused to participate, and all gave their informed consent to the study, which conformed with the principles of the Helsinki Declaration. Quality of life, knowledge, and coping ability were measured by questionnaires (1,4) at baseline and af-

ter 30 months. A1C, body weight, blood glucose, hypoglycemic episodes, and insulin dosages were checked every 3 months.

All patients completed the study. Compared with baseline, the quality of life score improved ( $P < 0.0001$ ) in both the patients on the carbohydrate counting program ( $88.7 \pm 9.2$  vs.  $78.0 \pm 9.9$ ) and the control subjects ( $88.7 \pm 12.5$  vs.  $80.4 \pm 11.7$ ). However, knowledge ( $9.3 \pm 1.7$  vs.  $10.6 \pm 0.6$ ,  $P < 0.0001$ ) and the three coping areas (problem solving:  $28.1 \pm 1.9$  vs.  $30.0 \pm 1.6$ ,  $P < 0.0001$ ; social support seeking:  $18.0 \pm 4.4$  vs.  $16.9 \pm 5.1$ ,  $P < 0.05$ ; and avoidance:  $16.7 \pm 3.6$  vs.  $14.8 \pm 3.5$ ,  $P < 0.005$ ) improved only in the former. All these variables showed a greater, though not statistically significant, improvement in patients with poor education levels. After 30 months, A1C was lower in the patients on carbohydrate counting than in the control subjects ( $7.2 \pm 0.9\%$  vs.  $7.9 \pm 1.4\%$ ,  $P < 0.05$ ). Insulin dosage, hypoglycemic episodes, and blood lipids did not change.

It was suggested that patients tend to cope with diabetes by avoiding the negative emotions associated with their disease rather than adjusting to the demands and challenges posed by it. This strategy is considered less adaptive (5). Our results confirm that group care improves quality of life in patients with type 1 diabetes (2) and suggest that specific educational and psychological supports are needed to improve adaptation to the disease. In fact, all three areas explored by the coping questionnaire were modified in directions that suggest better adaptation. Knowledge about nutritional aspects improved in both treatment groups but after adjusting for all control variables, the improvement remained significant only in the patients followed by carbohydrate counting, particularly those patients with poor education levels. We suggest that offering a carbohydrate counting program within a group care management approach may help patients with type 1 diabetes acquire better self-efficacy and restructure their cognitive and lifestyle potential.

MARINA TRENTO, MES, MBA<sup>1</sup>  
ENRICA BORGIO<sup>1</sup>  
CLAUDIA KUCICH, MD<sup>1</sup>  
PIETRO PASSERA, MD<sup>1</sup>  
ANNA TRINETTA, BS<sup>1</sup>  
LORENA CHARRIER, MD<sup>2</sup>  
FRANCO CAVALLO, MD<sup>2</sup>  
MASSIMO PORTA, MD, PHD<sup>1</sup>

From <sup>1</sup>the Laboratory of Clinical Pedagogy, Department of Internal Medicine, University of Turin, Turin, Italy; and the <sup>2</sup>Department of Public Health and Microbiology, University of Turin, Turin, Italy.

Corresponding author: Marina Trento, marina.trento@unito.it.

DOI: 10.2337/dc09-0903

© 2009 by the American Diabetes Association. Readers may use this article as long as the work is properly cited, the use is educational and not for profit, and the work is not altered. See <http://creativecommons.org/licenses/by-nc-nd/3.0/> for details.

**Acknowledgments**—No potential conflicts of interest relevant to this article were reported.

### References

1. Trento M, Passera P, Borgo E, Tomalino M, Bajardi M, Cavallo F, Porta M. A 5-year randomized controlled study of learning, problem solving ability, and quality of life modifications in people with type 2 diabetes managed by group care. *Diabetes Care* 2004;27:670–675
2. Trento M, Passera P, Borgo E, Tomalino M, Bajardi M, Brescianini A, Tomellini M, Giuliano S, Cavallo F, Miselli V, Bondonio P, Porta M. A 3-year prospective randomized controlled clinical trial of group care in type 1 diabetes. *Nutr Metab Cardiovasc Dis* 2005;15:293–301
3. DAFNE Study Group. Training in flexible, intensive insulin management to enable dietary freedom in people with type 1 diabetes: dose adjustment for normal eating (DAFNE) randomised controlled trial. *BMJ* 2002;325:746
4. Amirkhan JH. A factor analytically derived measure of coping: The Coping Strategy Indicator. *Journal of Personality and Social Psychology* 1990;59:1066–1074
5. de Ridder D, Schreurs K. Developing interventions for chronically ill patients: is coping a helpful concept? *Clinical Psychology Review* 2001;21:205–240
